# Supplementary material for: Toxoplasma gondii peptide ligands open the gate of the HLA class I binding groove
Source: eLife. 2016 Jan 29;5:e12556. doi: 10.7554/eLife.12556 (PMC4775218; doi:10.7554/eLife.12556)
Supplement: Supplementary file 1. — DOI: http://dx.doi.org/10.7554/eLife.12556.016 [file elife-12556-supp1.xlsx]

## Sheet: Sheet1
	T. gondii Ligand Sequence	H. sapiens Ligand Sequence	Length	Ile/Leu Ambiguity	T. gondii Source Protein	H. sapiens Source Protein	T. gondii NCBI Acession	H. sapiens NCBI acession
	LLDLIQTKV	LLDLIQTKV	9		putative beta adaptin protein	adaptor-related protein complex 1, beta 1 subunit	gi|237834817	gi|260436864
	GLYEGLDWL	GLYEGLDWL	9		ADP ribosylation factor ARF1	ADP-ribosylation factor 3	gi|237844645	gi|40889633
	GLYEGLDWLS	GLYEGLDWLS	10		ADP ribosylation factor ARF1	ADP-ribosylation factor 3	gi|237844645	gi|40889633
	GLDNAGKTTI	GLDNAGKTTI	10		putative ADP-ribosylation factor family protein 1	ADP-ribosylation factor-like protein 5A	gi|237832177
	GMNQFKPIFL	GMNQFKPIFL	10		cytosolic tRNA-Ala synthetase	alanyl-tRNA synthetase	gi|237842821	gi|194386694
	GLFGGAGVGKTVL	GLFGGAGVGKTVL	13		ATP synthase beta chain, putative	ATP synthase beta subunit	gi|237832039
	HLDATTVLS	HLDATTVLS	9		ATP synthase beta chain, putative	ATP synthase, H+ transporting, mitochondrial F1 complex, beta polypeptide	gi|237832039	gi|32189394
	LIMELINNV	LIMELINNV	9		ATP synthase beta chain, putative	ATP synthase, H+ transporting, mitochondrial F1 complex, beta polypeptide	gi|237832039	gi|32189394
	LLGRIPSAVG	LLGRIPSAVG	10		ATP synthase beta chain, putative	ATP synthase, H+ transporting, mitochondrial F1 complex, beta polypeptide	gi|237832039	gi|32189394
	SLQDIIAILGMD	SLQDIIAILGMD	12		ATP synthase beta chain, putative	ATP synthase, H+ transporting, mitochondrial F1 complex, beta polypeptide	gi|237832039	gi|32189394
	SLQDIIAILGMDE	SLQDIIAILGMDE	13		ATP synthase beta chain, putative	ATP synthase, H+ transporting, mitochondrial F1 complex, beta polypeptide	gi|237832039	gi|32189394
	SLQDIIAILGMDELSEEDK	SLQDIIAILGMDELSEEDK	19		ATP synthase beta chain, putative	ATP synthase, H+ transporting, mitochondrial F1 complex, beta polypeptide	gi|237832039	gi|32189394
	LLQDYKSLQDIIA	ILQDYKSLQDIIA	13	X	ATP synthase beta chain, putative	ATP synthase, H+ transporting, mitochondrial F1 complex, beta polypeptide	gi|237832039	gi|32189394
	GLSAFLHAI	GLSAFLHAI	9		ATPase family associated with various cellular activities (AAA) subfamily protein	ATPase, H+ transporting, lysosomal V0 subunit a2	gi|237834969	gi|158259805
	LLDEPTNHL	LLDEPTNHL	9		ABC transporter, ATP-binding domain-containing protein	ATP-binding cassette, sub-family F (GCN20), member 2	gi|260401164	gi|119574400
	FLLSTRAGGLG	FLLSTRAGGLG	11		SWI2/SNF2 ISWI-like (AT hook)	chromodomain helicase DNA binding protein 4	gi|237833381	gi|193785938
	VLTGHNHYV	VLTGHNHYV	9		putative coatomer protein complex, subunit alpha	coatomer protein complex, subunit alpha	gi|237834773	gi|119573109
	YLGKTVQV	YLGKTVQV	8		CTP synthase, putative [ Toxoplasma gondii ME49 ]	CTP synthase 1	gi|237844983
	KIGEGTYGV	KIGEGTYGV	9		putative cell-cycle-associated protein kinase CDK	cyclin-dependent kinase 1	gi|237842625	gi|78070384
	KLADFGLARA	KLADFGLARA	10		putative cell-cycle-associated protein kinase CDK	cyclin-dependent kinase 1	gi|237842625	gi|78070384
	TLWYRPPEL	TLWYRPPEL	9		putative cell-cycle-associated protein kinase CDK	cyclin-dependent kinase 13	gi|237835925	gi|193506638
	FMDPPAPETLM	FMDPPAPETLM	11		ATP-dependent RNA helicase	DEAH (Asp-Glu-Ala-His) box helicase 15	gi|237845663	gi|119613227
	KLIVTSATL	KLIVTSATL	9		putative pre-mRNA-splicing factor ATP-dependent RNA helicase	DEAH (Asp-Glu-Ala-His) box polypeptide 8	gi|237830305	gi|119572065
	FIADLVVGL	FIADLVVGL	9		enolase 2	enolase 1	gi|50400628	gi|693933
	HIVGLDIFTGK	HLVGIDIFTGK	11	X	translation initiation factor eif-5A, putative	eukaryotic translation initiation factor 5A-2	gi|237836245
	KLFEFMHET	KLFEFMHET	9		putative exportin 1	exportin 1 (CRM1 homolog, yeast)	gi|237835977	gi|52545934
	IVEGLMTTV	IVEGLMTTV	9		glyceraldehyde-3-phosphate dehydrogenase	glyceraldehyde-3-phosphate dehydrogenase	gi|237838193	gi|31645
	GIVEGLMTT	GIVEGLMTT	9		glyceraldehyde-3-phosphate dehydrogenase	glyceraldehyde-3-phosphate dehydrogenase	gi|237838193	gi|31645
	GIVEGLMTTV	GIVEGLMTTV	10		glyceraldehyde-3-phosphate dehydrogenase	glyceraldehyde-3-phosphate dehydrogenase	gi|237838193	gi|31645
	FGIVEGLMTTV	FGIVEGLMTTV	11		glyceraldehyde-3-phosphate dehydrogenase	glyceraldehyde-3-phosphate dehydrogenase	gi|237838193	gi|31645
	LVEGLMTTV	IVEGLMTTV	9	X	glyceraldehyde-3-phosphate dehydrogenase	glyceraldehyde-3-phosphate dehydrogenase	gi|13377046	gi|31645
	FGLVEGLMTTV	FGIVEGLMTTV	11	X	glyceraldehyde-3-phosphate dehydrogenase	glyceraldehyde-3-phosphate dehydrogenase	gi|13377046	gi|31645
	YLTAEVLEL	YLTAEVLEL	9		histone H2AZ	H2A histone family, member V	gi|237844891	gi|41406067
	YLTAEVLELAGN	YLTAEVLELAGN	12		histone H2AZ	H2A histone family, member V	gi|237844891	gi|41406067
	YLTAEVLELAGNA	YLTAEVLELAGNA	13		histone H2AZ	H2A histone family, member V	gi|237844891	gi|41406067
	YLTAEVLELAGNASK	YLTAEVLELAGNASK	15		histone H2AZ	H2A histone family, member V	gi|237844891	gi|41406067
	YLTAEVLELAGNASKD	YLTAEVLELAGNASKD	16		histone H2AZ	H2A histone family, member V	gi|237844891	gi|41406067
	YLTAEVLELAGNASKDL	YLTAEVLELAGNASKDL	17		histone H2AZ	H2A histone family, member V	gi|237844891	gi|41406067
	YLTAEVLELAGNASKDLK	YLTAEVLELAGNASKDLK	18		histone H2AZ	H2A histone family, member V	gi|237844891	gi|41406067
	YLTAEVLELAGNASKDLKV	YLTAEVLELAGNASKDLKV	19		histone H2AZ	H2A histone family, member V	gi|237844891	gi|41406067
	YLTAEVLELAGNASKDLKVK	YLTAEVLELAGNASKDLKVK	20		histone H2AZ	H2A histone family, member V	gi|237844891	gi|41406067
	VTIMPKDIQL	VTIMPKDIQL	10		histone H3.3	H3 histone, family 3C	gi|237831939	gi|44890574
	TIMPKDIQLA	TIMPKDIQLA	10		histone H3.3	H3 histone, family 3C	gi|237831939	gi|44890574
	VTIMPKDIQLA	VTIMPKDIQLA	11		histone H3.3	H3 histone, family 3C	gi|237831939	gi|44890574
	RIINEPTAA	RIINEPTAA	9		heat shock protein 70	heat shock 70kDa protein 1-like	gi|5738968	gi|194378760
	SLLTIEDGIFEV	SILTIEDGIFEV	12	X	heat shock protein 70	heat shock 70kDa protein 1-like	gi|5738968	gi|194378760
	TIEDGIFEV	TIEDGIFEV	9		heat shock protein 70	heat shock 70kDa protein 8	gi|5738968	gi|193788318
	LTIEDGIFEV	LTIEDGIFEV	10		heat shock protein 70	heat shock 70kDa protein 8	gi|5738968	gi|193788318
	LLTIEDGIFEV	ILTIEDGIFEV	11	X	heat shock protein 70	heat shock 70kDa protein 8	gi|5738968	gi|193788318
	SLLTIEDGIFEVK	SILTIEDGIFEVK	13	X	heat shock protein 70	heat shock 70kDa protein 8	gi|5738968	gi|193788318
	LLDVAPLSL	LLDVAPLSL	9		heat shock protein 70	heat shock protein 70	gi|5738968
	LLLDVAPLSL	LLLDVAPLSL	10		heat shock protein 70	heat shock protein 70	gi|5738968
	LLDVAPLSLGLETAGGVMT	LLDVAPLSLGLETAGGVMT	19		heat shock protein 70	heat shock protein 70	gi|5738968
	IINTFYSNKEIFL	IINTFYSNKEIFL	13		heat shock protein HSP90	heat shock protein 90kDa alpha (cytosolic), class B member 1	gi|237837961	gi|194378142
	SLIINTFYSNKEIFL	SLIINTFYSNKEIFL	15		heat shock protein HSP90	heat shock protein 90kDa alpha (cytosolic), class B member 1	gi|237837961	gi|194378142
	NIQGITKPAIR	NIQGITKPAIR	11		histone H4	histone cluster 1	gi|237834537	gi|124504316
	DNIQGITKPAIR	DNIQGITKPAIR	12		histone H4	histone cluster 1	gi|237834537	gi|124504316
	VLRDNIQGITKPAIR	VLRDNIQGITKPAIR	15		histone H4	histone cluster 1	gi|237834537	gi|124504316
	YLAAVLEYL	YLAAVLEYL	9		histone H2AX	histone cluster 1, H2ah	gi|237831985	gi|18105045
	IQTAVRLLL	IQTAVRLLL	9		histone H2Bv	histone cluster 1, H2bh	gi|237840885	gi|31979
	AQFEHTLLV	AQFEHTLLV	9		methionine aminopeptidase	methionyl aminopeptidase 1	gi|237835867	gi|20987224
	SLFDEEGAK	SLFDEEGAK	9		phosphoglycerate kinase PGKI	phosphoglycerate kinase 1	gi|92399535	gi|294662290
	SLFDEEGAKIV	SLFDEEGAKIV	11		phosphoglycerate kinase PGKI	phosphoglycerate kinase 1	gi|92399535	gi|294662290
	FMHGKIPTL	FMHGKIPTL	9		pre-mRNA processing splicing factor PRP8	pre-mRNA processing factor 8	gi|237837541	gi|119610994
	MLDPLEVHL	MLDPLEVHL	9		pre-mRNA processing splicing factor PRP8	pre-mRNA processing factor 8	gi|237837541	gi|119610994
	SIYPSPTGV	SIYPSPTGV	9		pre-mRNA processing splicing factor PRP8	pre-mRNA processing factor 8	gi|237837541	gi|119610994
	HLLDFPNIVI	HLLDFPNIVI	10		pre-mRNA processing splicing factor PRP8	pre-mRNA processing factor 8	gi|237837541	gi|119610994
	GMLDPLEVHL	GMLDPLEVHL	10		pre-mRNA processing splicing factor PRP8	pre-mRNA processing factor 8	gi|237837541	gi|119610994
	HLLDFPNIVIK	HLLDFPNIVIK	11		pre-mRNA processing splicing factor PRP8	pre-mRNA processing factor 8	gi|237837541	gi|119610994
	YLGDGPKLV	YLGDGPKLV	9		putative 26S protease regulatory subunit 4	proteasome (prosome, macropain) 26S subunit, ATPase, 1	gi|237838979	gi|45767857
	TMLELLNQLDG	TMLELLNQLDG	11		putative 26S protease regulatory subunit 4	proteasome (prosome, macropain) 26S subunit, ATPase, 5	gi|237838979	gi|119614675
	GLATDVQTV	GLATDVQTV	9		proteasome beta subunit	proteasome (prosome, macropain) subunit, beta type, 3	gi|237830643	gi|22538465
	ALDEPTTNL	ALDEPTTNL	9		RecF/RecN/SMC N terminal domain-containing protein	RAD50 homolog (S. cerevisiae)	gi|237831333	gi|5739043
	YNFEKPFLWLA	YNFEKPFLWLA	11		GTP-binding nuclear protein ran/tc4	RAN, member RAS oncogene family	gi|237835767	gi|48734884
	VLFDKATYDKL	VLFDKATYDKL	11		ribosomal protein RPS25	ribosomal protein S25	gi|237837435	gi|119569329
	TLTGKTITL	TLTGKTITL	9		putative polyubiquitin UbC	ribosomal protein S27a	gi|237838205	gi|56967061
	GLDNAGKTTL	GLDNAGKTTL	10		putative small GTP-binding protein sar1	SAR1 homolog A (S. cerevisiae)	gi|237843059	gi|119574766
	ILPDSLPLDTL	ILPDSLPLDTL	11		LSM domain-containing protein	small nuclear ribonucleoprotein D1 polypeptide 16kDa	gi|237839011	gi|5902102
	FILPDSLPLDTL	FILPDSLPLDTL	12		LSM domain-containing protein	small nuclear ribonucleoprotein D1 polypeptide 16kDa	gi|237839011	gi|5902102
	FILPDSLPLDT	FILPDSLPLDT	11		small nuclear ribonucleoprotein, putative	small nuclear ribonucleoprotein Sm D1	gi|237839011
	FVYPLDFART	FVYPLDFART	10		mitochondrial carrier domain-containing protein [Toxoplasma gondii ME49]	solute carrier family 25 (mitochondrial carrier; adenine nucleotide translocator), member 5	gi|237844923
	VLATLLNNL	VLATLLNNL	9		putative U2 small nuclear ribonucleoprotein family protein	splicing factor 3b, subunit 1, 155kDa	gi|237836871	gi|4033735
	FQLPIRFNL	FQLPIRFNL	9		threonyl-tRNA synthetase family protein	threonyl-tRNA synthetase	gi|237844903	gi|52632425
	LLFSFAQAV	LLFSFAQAV	9		transaldolase	transaldolase 1	gi|237837165	gi|48257056
	TVVPGGDLAKV	TVVPGGDLAKV	11		alpha tubulin TUBA1	tubulin, alpha 1b	gi|237831019	gi|193787715
	KFWEVISDEHGIDPTGT	KFWEVISDEHGIDPTGT	17		putative beta-1 tubulin	tubulin, beta 4B class IVb	gi|237838955	gi|20809886
	IMQLLRDNLTL	IMQLLRDNLTL	11		14-3-3 protein	tyrosine 3-monooxygenase/tryptophan 5-monooxygenase activation protein, zeta	gi|237832223	gi|161172138
	STLHLVLRL	STLHLVLRL	9		ribosomal-ubiquitin protein RPL40	ubiquitin B	gi|237838205	gi|56967061
	FLHWYTGEGM	FLHWYTGEGM	10		tubulin beta chain, putative	tubulin, beta class I	gi|237838955
