# Supplementary material for: Toxoplasma gondii peptide ligands open the gate of the HLA class I binding groove
Source: eLife. 2016 Jan 29;5:e12556. doi: 10.7554/eLife.12556 (PMC4775218; doi:10.7554/eLife.12556)
Supplement: Supplementary file 2. — DOI: http://dx.doi.org/10.7554/eLife.12556.017 [file elife-12556-supp2.xlsx]

## Sheet: Sheet1
	Ligand Name	Ligand Sequence	Modified Ligand Sequence	Length	T. gondii Source Protein	Gene Symbol	TDB Accession	PEAKS Score (-logP)	m/z	z	Observed Precursor Mass	Δ ppm (Obs-Theo)	H.sapiens homology	Predicted Affinity	Predicted Binding Rank	Normalized Location
	AARS(1114-1128)	GLLDGAGPLPLVGKR		15	cytosolic tRNA-Ala synthetase	AARS	TGGT1_219540	43.39	488.291	3	1461.87	-10.7	NSH	0.078	32	0.879842
	AARS(1172-1185)	FLVLNLPQLLGDGK		14	cytosolic tRNA-Ala synthetase	AARS	TGGT1_219540	60.4	763.953	2	1525.89	2.5	NSH	0.124	32	0.924961
	ABCB1(1256-1274)	ILDEATSALDPESERQVQK		19	ATP-binding cassette transporter ABC.B1	ABCB1	TGGT1_260310	50.02	710.369	3	2128.06	9.1	0.842105	0.117	32	0.946456
	AGCK(589-598)	LLDEHGHVRL		10	AGC kinase	AGCK	TGGT1_267540	43.04	396.887	3	1187.64	-2.6	NSH	0.689	1.5	0.624867
	AP2XI-3(1167-1175)	LLLQQQQQL		9	AP2 domain transcription factor AP2XI-3	AP2XI-3	TGGT1_310950	34.9	556.329	2	1110.64	3.8	NSH	0.53	3	0.837644
	BFCCP(150-159)	KLLDQIKQLK		10	Brf1p family coiled coil protein	BFCCP	TGGT1_232440	38.01	409.594	3	1225.78	-13.1	NSH	0.094	32	0.325328
	CNPDC(1052-1060)	LALEQVADI		9	3'5'-cyclic nucleotide phosphodiesterase domain-containing protein	CNPDC	TGGT1_257080	38.63	486.266	2	970.533	-15.6	NSH	0.179	15	0.63813
	CPC1(347-358)	KLDESEQTLEVL		12	cathepsin CPC1	CPC1	TGGT1_289620	32.54	702.363	2	1402.72	-5.5	NSH	0.584	2	0.479889
	CPC1(347-363)	KLDESEQTLEVLSPVSA		17	cathepsin CPC1	CPC1	TGGT1_289620	49.65	615.648	3	1843.94	-9.7	NSH	0.519	3	0.48324
	CPS(1188-1196)	LSLETVLNI	LSLE(+21.98)TVLNI	9	carbamoylphosphate synthetase	CPS	TGGT1_215260	31.44	512.293	2	1022.56	9.4	NSH	0.247	9	0.702367
	DG32(225-238)	SLLKLYNEDLEPLL		14	dense-granule antigen DG32	DG32	TGGT1_222170	35	830.475	2	1658.91	13.5	NSH	0.672	1.5	0.783217
	DG32(250-259)	ILFDSKLATI		10	dense-granule antigen DG32	DG32	TGGT1_222170	32.91	560.831	2	1119.65	-6.1	NSH	0.71	1	0.858621
	DG32(250-260)	ILFDSKLATIR		11	dense-granule antigen DG32	DG32	TGGT1_222170	39.02	426.251	3	1275.76	-19.1	NSH	0.121	32	0.861592
	DG32(94-106)	VMSELEFYLFGEK		13	dense granule protein DG32	DG32	TGGT1_297880	56.28	796.39	2	1590.76	1.5	NSH	0.132	32	0.451456
	EEF1A(213-221)	TLVEALDTM		9	putative elongation factor 1-alpha (EF-1-ALPHA)	EEF1A	TGGT1_286420A	35.95	496.749	2	991.49	-6.6	NSH	0.474	4	0.482916
	EEF1A(213-222)	TLVEALDTME		10	putative elongation factor 1-alpha (EF-1-ALPHA)	EEF1A	TGGT1_286420A	50.83	561.265	2	1120.53	-14.7	NSH	0.063	32	0.484018
	EEF1A(213-224)	TLVEALDTMEAP		12	putative elongation factor 1-alpha (EF-1-ALPHA)	EEF1A	TGGT1_286420A	43.93	645.306	2	1288.62	-19.3	NSH	0.127	32	0.486239
	EEF1A(213-225)	TLVEALDTMEAPK		13	putative elongation factor 1-alpha (EF-1-ALPHA)	EEF1A	TGGT1_286420A	53	709.369	2	1416.72	4	NSH	0.11	32	0.487356
	EEF1A(213-231)	TLVEALDTMEAPKRPSDKP		19	putative elongation factor 1-alpha (EF-1-ALPHA)	EEF1A	TGGT1_286420A	53.21	525.269	4	2097.08	-15.2	0.631579	0.074	32	0.494172
	EEF1A(213-232)	TLVEALDTMEAPKRPSDKPL		20	putative elongation factor 1-alpha (EF-1-ALPHA)	EEF1A	TGGT1_286420A	57.97	553.552	4	2210.16	7.7	0.65	0.511	3	0.495327
	EEF1A(288-298)	AVPGDNVGFNV		11	putative elongation factor 1-alpha (EF-1-ALPHA)	EEF1A	TGGT1_286420A	32.15	544.773	2	1087.53	0.7	0.909091	0.349	6	0.656751
	EEF1A(326-337)	FLAQVIVLNHPG		12	putative elongation factor 1-alpha (EF-1-ALPHA)	EEF1A	TGGT1_286420A	62.78	654.372	2	1306.74	-8.2	0.833333	0.476	4	0.745413
	EEF1A(326-339)	FLAQVIVLNHPGEI		14	putative elongation factor 1-alpha (EF-1-ALPHA)	EEF1A	TGGT1_286420A	59.88	775.435	2	1548.87	-7.4	0.785714	0.735	0.8	0.748848
	EEF1A(326-340)	FLAQVIVLNHPGEIK		15	putative elongation factor 1-alpha (EF-1-ALPHA)	EEF1A	TGGT1_286420A	83.27	839.487	2	1676.96	-0.9	0.733333	0.14	16	0.750577
	EEF1A(326-341)	FLAQVIVLNHPGEIKN		16	putative elongation factor 1-alpha (EF-1-ALPHA)	EEF1A	TGGT1_286420A	49.43	598.009	3	1791	-0.3	0.6875	0.256	9	0.752315
	EEF1A(326-342)	FLAQVIVLNHPGEIKNG		17	putative elongation factor 1-alpha (EF-1-ALPHA)	EEF1A	TGGT1_286420A	77.67	617.008	3	1848.03	-12.7	0.705882	0.299	8	0.75406
	EIF4A(185-195)	FIMDEADEMLS		11	putative eukaryotic initiation factor-4A	EIF4A	TGGT1_250770	41.29	650.77	2	1299.54	-8.2	NSH	0.345	6	0.458853
	GAPDH(174-185)	YLALPPHIFAPA		12	glucose-6-phosphate dehydrogenase	GAPDH	TGGT1_294200	53.13	655.367	2	1308.72	-2.3	NSH	0.744	0.8	0.315693
	GAPDH(306-323)	VVMERPATLSDEDIRDEK		18	glucose-6-phosphate dehydrogenase	GAPDH	TGGT1_294200	77.4	701.707	3	2102.03	32.3	0.555556	0.059	50	0.562731
	GAPDH(423-432)	LILEVQPHPS		10	glucose-6-phosphate dehydrogenase	GAPDH	TGGT1_294200	48.65	566.826	2	1131.63	7.2	NSH	0.195	15	0.767273
	GAPDH(423-433)	LILEVQPHPSV		11	glucose-6-phosphate dehydrogenase	GAPDH	TGGT1_294200	43.8	616.348	2	1230.7	-13.4	NSH	0.705	1	0.76867
	GAPDH2(815-823)	GLVEGLMTT		9	glyceraldehyde-3-phosphate dehydrogenase GAPDH2	GAPDH2	TGGT1_269190	46.32	460.742	2	919.468	0.6	NSH	0.691	1.5	0.825558
	GAPDH2(815-824)	GLVEGLMTTV		10	glyceraldehyde-3-phosphate dehydrogenase GAPDH2	GAPDH2	TGGT1_269190	55.21	510.283	2	1018.54	14.5	NSH	0.845	0.17	0.826396
	GAPDH2(873-881)	KLTGMAFRV		9	glyceraldehyde-3-phosphate dehydrogenase GAPDH2	GAPDH2	TGGT1_269190	32.33	341.526	3	1021.57	-16.4	NSH	0.8	0.4	0.884381
	GRA1(163-174)	KVIDDVQQLEKD		12	dense granule protein GRA1	GRA1	TGGT1_270250	73.9	715.366	2	1428.75	-20.3	NSH	0.031	50	0.910112
	GRA1(163-177)	KVIDDVQQLEKDKQQ		15	dense granule protein GRA1	GRA1	TGGT1_270250	86.08	605.322	3	1812.96	-8.6	NSH	0.029	50	0.925714
	GRA1(163-181)	KVIDDVQQLEKDKQQLKDD		19	dense granule protein GRA1	GRA1	TGGT1_270250	46.43	572.046	4	2284.19	-16.2	NSH	0.022	50	0.947368
	GRA1(163-183)	KVIDDVQQLEKDKQQLKDDIG		21	dense granule protein GRA1	GRA1	TGGT1_270250	45.98	614.588	4	2454.3	11.1	NSH	0.041	50	0.95858
	GRA1(163-190)	KVIDDVQQLEKDKQQLKDDIGFLTGERE		28	dense granule protein GRA1	GRA1	TGGT1_270250	80.17	822.677	4	3286.7	-7.2	0.321429	0.029	50	1
	GRA1(40-53)	SLFGLLSGGTGQGL		14	dense granule protein GRA1	GRA1	TGGT1_270250	64.19	653.855	2	1305.69	2.6	NSH	0.664	1.5	0.221591
	GRA12(209-219)	VFLLLAPAPTF		11	dense granule protein GRA12	GRA12	TGGT1_288650	52.64	594.861	2	1187.7	10.4	NSH	0.07	32	0.489412
	GRA12(325-333)	FLNTVEVRV		9	dense granule protein GRA12	GRA12	TGGT1_288650	48.52	538.811	2	1075.6	4.4	NSH	0.761	0.8	0.758782
	GRA12(325-334)	FLNTVEVRVT		10	dense granule protein GRA12	GRA12	TGGT1_288650	53.19	589.329	2	1176.65	-5.7	NSH	0.342	6	0.760563
	GRA12(325-335)	FLNTVEVRVTG		11	dense granule protein GRA12	GRA12	TGGT1_288650	56.49	617.841	2	1233.67	-4.4	NSH	0.236	10	0.762353
	GRA12(325-337)	FLNTVEVRVTGMD		13	dense granule protein GRA12	GRA12	TGGT1_288650	72.29	740.883	2	1479.74	8	NSH	0.118	32	0.765957
	GRA12(358-384)	RATYIPVSMYLSTDPTLTHEYEAAKTV		27	dense granule protein GRA12	GRA12	TGGT1_288650	58.82	765.128	4	3056.52	-11	NSH	0.154	15	0.872861
	GRA12(358-385)	RATYIPVSMYLSTDPTLTHEYEAAKTVK		28	dense granule protein GRA12	GRA12	TGGT1_288650	50.8	797.155	4	3184.61	-6.8	NSH	0.019	50	0.875
	GRA12(359-385)	ATYIPVSMYLSTDPTLTHEYEAAKTVK		27	dense granule protein GRA12	GRA12	TGGT1_288650	79.44	758.131	4	3028.51	-5.3	NSH	0.053	50	0.875306
	GRA2(105-115)	KVVAEKGFTAA		11	dense granule protein 2	GRA2	TGGT1_227620	46.84	560.811	2	1119.63	-19.4	NSH	0.211	15	0.597701
	GRA2(161-173)	GLAETEVPVEPQQ		13	dense granule protein 2	GRA2	TGGT1_227620	59.75	698.846	2	1395.69	-6.9	NSH	0.144	16	0.930233
	GRA2(161-174)	GLAETEVPVEPQQR		14	dense granule protein 2	GRA2	TGGT1_227620	53.81	776.89	2	1551.79	-15.1	NSH	0.075	32	0.935673
	GRA2(161-185)	GLAETEVPVEPQQRAAHVPVPDFSQ		25	dense granule protein 2	GRA2	TGGT1_227620	49.27	901.105	3	2700.35	-21	NSH	0.173	15	1
	GRA3(51-59)	ALAEPVTGV		9	dense granule protein 3	GRA3	TGGT1_227280	36.55	428.739	2	855.47	-8.6	NSH	0.847	0.15	0.234742
	GRA3(51-62)	ALAEPVTGVGEA		12	dense granule protein 3	GRA3	TGGT1_227280	59.26	557.288	2	1112.57	-8.3	NSH	0.609	2	0.238095
	GRA3(51-67)	ALAEPVTGVGEAGVSPV		17	dense granule protein 3	GRA3	TGGT1_227280	61.21	776.9	2	1551.81	-18.1	NSH	0.886	0.08	0.243902
	GRA4(149-163)	YYHPAAVPPPGPSVF		15	dense granule protein GRA4	GRA4	TGGT1_310780	47.96	799.888	2	1597.79	-19.2	NSH	0.088	32	0.448485
	GRA7(142-150)	KLALPAVGM		9	dense granule protein 7	GRA7	TGGT1_203310	32.95	450.268	2	898.531	-10	NSH	0.367	6	0.621145
	GRA7(142-152)	KLALPAVGMGA		11	dense granule protein 7	GRA7	TGGT1_203310	36.81	514.298	2	1026.59	-8.3	NSH	0.427	5	0.626667
	GRA7(144-152)	ALPAVGMGA		9	dense granule protein 7	GRA7	TGGT1_203310	34.34	393.707	2	785.41	-13.2	NSH	0.346	6	0.629956
	GRA7(46-56)	GQAPVDSLRPT		11	dense granule protein 7	GRA7	TGGT1_203310	39.43	570.802	2	1139.59	-3.1	NSH	0.119	32	0.2
	H2A(139-147)	SLMTKGPST		9	histone H2A	H2A	TGGT1_300200	52.33	461.232	2	920.464	-15.3	0.777778	0.432	5	0.945205
	H2A(139-150)	SLMTKGPSTQPM		12	histone H2A	H2A	TGGT1_300200	48.09	639.315	2	1276.62	-0.2	0.583333	0.57	3	0.965035
	H2A(47-55)	GLQFPVGRV		9	histone H2A	H2A	TGGT1_300200	39.74	486.784	2	971.555	-1.5	NSH	0.303	7	0.315068
	H2A(79-88)	AILEYLTAEV		10	histone H2A	H2A	TGGT1_300200	36.21	561.31	2	1120.6	4.1	NSH	0.857	0.12	0.537931
	HEARTR(732-740)	LLASLATSV		9	HEAT repeat-containing protein	HEARTR	TGGT1_305040	34.67	437.767	2	873.517	1.7	NSH	0.796	0.4	0.628007
	HSP70(135-143)	YLGKEVKEA		9	heat shock protein HSP70	HSP70	TGGT1_273760	37.64	346.192	3	1035.56	-7.2	0.666667	0.443	4	0.203647
	HSP70(173-181)	IINEPTAAA		9	heat shock protein HSP70	HSP70	TGGT1_273760	38.56	450.238	2	898.476	-15.3	NSH	0.36	6	0.261398
	HSP70(288-298)	SLFEGIDYSVS		11	heat shock protein HSP70	HSP70	TGGT1_273760	44.08	608.782	2	1215.57	-14.2	0.636364	0.426	5	0.4375
	HSP70(393-414)	LLLLDVAPLSLGLETAGGVMTK		22	heat shock protein HSP70	HSP70	TGGT1_273760	86.39	737.756	3	2210.26	-5.7	0.954545	0.128	32	0.607752
	HSP70(395-414)	LLDVAPLSLGLETAGGVMTK		20	heat shock protein HSP70	HSP70	TGGT1_273760	87.37	662.367	3	1984.09	-6.7	0.95	0.101	32	0.608964
	HSP70(450-458)	AMTKDNNLL		9	heat shock protein HSP70	HSP70	TGGT1_273760	32.32	510.269	2	1018.51	11.2	NSH	0.348	6	0.682371
	LSMDC(68-90)	FILPDSLPLDTLLIDDTPLQRPA		23	LSM domain-containing protein	LSMDC	TGGT1_267350	41.76	855.135	3	2562.39	-4.6	0.608696	0.567	3	0.683673
	MAG1(273-284)	KLEEIDDLLQLT		12	MAG1 protein (MAG1)	MAG1	TGGT1_270240	40.03	715.386	2	1428.77	-9.2	NSH	0.332	7	0.618182
	MAG1(273-287)	KLEEIDDLLQLTRAL		15	MAG1 protein (MAG1)	MAG1	TGGT1_270240	53.61	590.674	3	1768.99	4.3	NSH	0.429	5	0.622426
	MAG1(334-345)	SLLGVDAVEKQL	SLLGVDAVEKQ(+.98)L	12	unspecified product (MAG1)	MAG1	TGME49_270240	64.37	636.861	2	1271.7	7.8	NSH	0.485	4	0.756818
	MAG1(412-423)	ALVEAFKAIQRA		12	MAG1 protein (MAG1)	MAG1	TGGT1_270240	52.89	439.587	3	1315.76	-16.2	NSH	0.548	3	0.934091
	MIC11(148-156)	FVDTLKTLA		9	microneme protein MIC11	MIC11	TGGT1_204530	43.68	504.294	2	1006.57	3.4	NSH	0.286	8	0.753846
	NARS(589-604)	AMDVLVPKIGELVGGS		16	asparaginyl-tRNA synthetase (NOB+tRNA synthase)	NARS	TGGT1_270510	56.23	792.94	2	1583.86	4.3	0.625	0.18	15	0.890909
	NARS(589-605)	AMDVLVPKIGELVGGSQ		17	asparaginyl-tRNA synthetase (NOB+tRNA synthase)	NARS	TGGT1_270510	61.88	856.966	2	1711.92	0.3	0.588235	0.093	32	0.892261
	NARS(589-609)	AMDVLVPKIGELVGGSQREDD		21	asparaginyl-tRNA synthetase (NOB+tRNA synthase)	NARS	TGGT1_270510	63.95	743.401	3	2227.12	30	0.571429	0.04	50	0.89771
	NARS(589-610)	AMDVLVPKIGELVGGSQREDDR		22	asparaginyl-tRNA synthetase (NOB+tRNA synthase)	NARS	TGGT1_270510	44.05	596.81	4	2383.22	-2.1	0.545455	0.042	50	0.899083
	NARS(589-611)	AMDVLVPKIGELVGGSQREDDRD		23	asparaginyl-tRNA synthetase (NOB+tRNA synthase)	NARS	TGGT1_270510	61.91	625.578	4	2498.24	15.4	0.521739	0.041	50	0.900459
	NARS(589-619)	AMDVLVPKIGELVGGSQREDDRDRLAAMIAA		31	asparaginyl-tRNA synthetase (NOB+tRNA synthase)	NARS	TGGT1_270510	32.69	824.942	4	3295.7	11.8	0.419355	0.561	3	0.911628
	NTP(167-176)	QLNEEQKVQV		10	nucleoside-triphosphatase	NTP	TGGT1_411590	33.21	607.814	2	1213.63	-13.2	NSH	0.401	5	0.407862
	NTPA2(1-14)	LLFQYVPQMHEGAK		14	NTPase II	NTPA2	TGGT1_277270	46.52	554.296	3	1659.84	12.5	NSH	0.163	15	0
	NTPA2(15-26)	KLMQLLEEDTVA		12	NTPase II	NTPA2	TGGT1_277270	40.06	695.364	2	1388.72	-6.6	NSH	0.64	1.5	0.0164706
	NTPA2(544-554)	VLEEWLDTYAG		11	NTPase II	NTPA2	TGGT1_277270	37.82	648.309	2	1294.61	-4.3	NSH	0.198	15	0.638073
	pASC1CS3(1023-1031)	IIIDEIHLL		9	putative activating signal cointegrator 1 complex subunit 3	pASC1CS3	TGGT1_249810	34.15	539.83	2	1077.64	1.3	NSH	0.723	0.8	0.367362
	PCID(122-140)	GQSPAPPALELGVDALVPR		19	PCI domain-containing protein	PCID	TGGT1_273520	91.52	629.687	3	1886.03	6.8	NSH	0.07	32	0.207904
	PCID(122-142)	GQSPAPPALELGVDALVPRLA		21	PCI domain-containing protein	PCID	TGGT1_273520	66.14	691.05	3	2070.15	-9	NSH	0.118	32	0.208621
	PCID(122-143)	GQSPAPPALELGVDALVPRLAK		22	PCI domain-containing protein	PCID	TGGT1_273520	67.62	733.754	3	2198.24	-1.5	NSH	0.034	50	0.208981
	pfkBF(344-356)	ILFGNEEEFAHLA		13	kinase, pfkB family protein	pfkBF	TGGT1_250880	46.78	745.351	2	1488.72	-24.9	NSH	0.655	1.5	0.722105
	PFP(157-165)	YLLTAPVKA		9	phosphorylase family protein	PFP	TGGT1_310640	31.62	488.288	2	974.58	-18.7	NSH	0.704	1	0.530612
	PHGDH(210-218)	FITLHVPLL		9	D-3-phosphoglycerate dehydrogenase	PHGDH	TGGT1_239820	45.89	526.827	2	1051.64	-4.2	NSH	0.571	3	0.351261
	PI34K(676-686)	LGNPLSLSTLQ	LGNPLSLSTLQ(+.98)	11	phosphatidylinositol 3- and 4-kinase	PI34K	TGGT1_296010	31.44	572.323	2	1142.62	11.8	NSH	0.015	50	0.429389
	PLA(233-250)	ALAALAPSLEVGKPAKNE		18	phospholipase	PLA	TGGT1_306330	54.6	593.677	3	1777.99	8.3	NSH	0.062	32	0.411348
	PLP1(207-217)	FLFEDDTPKKP		11	perforin-like protein PLP1	PLP1	TGGT1_204130	36.84	446.233	3	1335.67	5.1	NSH	0.306	7	0.17913
	PLP1(207-218)	FLFEDDTPKKPK		12	perforin-like protein PLP1	PLP1	TGGT1_204130	70.93	366.948	4	1463.77	-2	NSH	0.237	10	0.179286
	PNO1(194-203)	ALLRLDDLFI		10	putative pre-rRNA-processing protein PNO1	PNO1	TGGT1_220490	37.38	594.852	2	1187.69	-1.2	NSH	0.527	3	0.677193
	PNP5(20-32)	KLLEVEDANDLTS		13	putative nucleolar protein 5	PNP5	TGGT1_205510	64.21	723.863	2	1445.72	-9.7	NSH	0.323	7	0.0398323
	PNP5(81-91)	HLLQTDASAQL		11	putative nucleolar protein 5	PNP5	TGGT1_205510	33.64	598.808	2	1195.62	-14.7	NSH	0.54	3	0.167015
	pOS(1835-1844)	SLGEWQGLTL		10	omega secalin, putative	pOS	TGME49_231960	39.13	552.294	2	1102.57	7.6	NSH	0.503	3	0.968321
	PP1(50-60)	ILLELEAPIKI		11	serine/threonine phosophatase PP1	PP1	TGGT1_310700	54.9	626.391	2	1250.78	-14.5	NSH	0.748	0.8	0.166102
	pPAP2G4(417-434)	LLYEKELDSIHTVEDESL		18	putative proliferation-associated protein 2G4	pPAP2G4	TGGT1_279390	42.57	711.684	3	2132.05	-9.8	NSH	0.653	1.5	0.936937
	pPAP2G4(417-435)	LLYEKELDSIHTVEDESLK		19	putative proliferation-associated protein 2G4	pPAP2G4	TGGT1_279390	54.75	754.376	3	2260.15	-17.7	NSH	0.136	32	0.939052
	PPIA(92-110)	FALQVGEISDIIDTDSGLH		19	peptidylprolyl isomerase	PPIA	TGGT1_258930	51.59	1015.49	2	2029	-16.7	0.526316	0.044	50	0.938144
	PPIA(93-111)	ALQVGEISDIIDTDSGLHL		19	peptidylprolyl isomerase	PPIA	TGGT1_258930	36.46	665.981	3	1995.02	-46.8	0.526316	0.4	5	0.948454
	PPIA(95-110)	QVGEISDIIDTDSGLH	Q(-17.03)VGEISDIIDTDSGLH	16	peptidylprolyl isomerase	PPIA	TGGT1_258930	52.22	841.386	2	1680.78	-16.3	NSH	0.025	50	0.94
	PPIA(96-110)	VGEISDIIDTDSGLH		15	peptidylprolyl isomerase	PPIA	TGGT1_258930	42.98	785.866	2	1569.75	-21.5	NSH	0.01	50	0.940594
	pPSMC1(309-317)	TMLELLNQL		9	putative 26S protease regulatory subunit 4	pPSMC1	TGGT1_267080	47.75	537.802	2	1073.58	9	NSH	0.783	0.5	0.712963
	pPSMC1(309-327)	TMLELLNQLDGFESKGDVK		19	putative 26S protease regulatory subunit 4	pPSMC1	TGGT1_267080	58.12	713.041	3	2136.08	11.7	0.894737	0.079	32	0.729858
	pPTA4(233-241)	QFLSPVVLL	Q(+.98)FLSPVVLL	9	putative P-type ATPase4	pPTA4	TGGT1_278660	31.66	508.823	2	1015.6	36.4	NSH	0.161	15	0.174567
	ProRS(189-203)	FLLTVTHDLPIPLKG		15	prolyl-trna synthetase (ProRS)	ProRS	TGGT1_219850	64.49	555.328	3	1662.97	-5.2	NSH	0.356	6	0.230675
	ProRS(568-581)	KMFEIEFEDEEGHK		14	prolyl-trna synthetase (ProRS)	ProRS	TGGT1_219850	72.63	589.933	3	1766.78	-3.6	NSH	0.215	15	0.694853
	pSPS(70-108)	FLNQLARPVAFPADETENKEDDAEKGGEGEAELSGKAEE		39	pre-mRNA splicing factor subunit	pSPS	TGGT1_314830	44.86	1048.5	4	4189.96	4	0.205128	0.124	32	1
	pTCP1(42-61)	MLVDDIGDMTITNDGATILK		20	putative T-complex protein 1 subunit alpha	pTCP1	TGGT1_229990	61.11	712.68	3	2135.05	-14.1	0.95	0.133	32	0.0776515
	pTCP1(42-71)	MLVDDIGDMTITNDGATILKQLEVQHPAAK		30	putative T-complex protein 1 subunit alpha	pTCP1	TGGT1_229990	79.67	810.183	4	3236.64	19.4	0.9	0.146	16	0.0791506
	pTMP(208-228)	RLFIGGGGMNGEFANTIIEEA		21	putative transmembrane protein	pTMP	TGGT1_410370	75.16	732.707	3	2195.07	13.9	NSH	0.502	3	0.5
	pTMP(220-228)	FANTIIEEA	FAN(+.98)TIIEE(+21.98)A	9	putative transmembrane protein	pTMP	TGGT1_410370	33.72	515.736	2	1029.46	-5.1	NSH	0.405	5	0.514085
	Rab11(54-63)	YLDEGKVIKA		10	Ras-related protein Rab11	Rab11	TGGT1_289680	32.08	379.213	3	1134.63	-10.8	NSH	0.704	1	0.253589
	RON8(2610-2626)	SIIDLVGASDGTQPLVL		17	rhoptry neck protein RON8	RON8	TGGT1_306060	42.55	849.479	2	1696.92	11.1	NSH	0.463	4	0.880526
	ROP5(363-371)	FLALHILTA		9	rhoptry protein ROP5	ROP5	TGGT1_308090	53.77	499.803	2	997.596	-5	NSH	0.781	0.5	0.67037
	ROP5(368-376)	ILTAQLIRL		9	rhoptry protein ROP5	ROP5	TGGT1_308090	42.02	520.844	2	1039.68	-2.3	NSH	0.617	2	0.67963
	RPL10A(109-121)	FLASQVLIPQIPR		13	ribosomal protein RPL10A	RPL10A	TGGT1_215470	72.25	741.452	2	1480.88	8.1	NSH	0.233	10	0.529412
	RPL7A(15-28)	YLSPIASPLLDGKS		14	putative 60S ribosomal protein L7a	RPL7A	TGGT1_313560	42.18	730.882	2	1459.79	-29.5	NSH	0.267	9	0.0880503
	RPL7A(15-30)	YLSPIASPLLDGKSLR		16	putative 60S ribosomal protein L7a	RPL7A	TGGT1_313560	71.38	577.326	3	1728.98	-11.6	NSH	0.167	15	0.089172
	RPL9(109-117)	TVVEIRNFL		9	ribosomal protein RPL9	RPL9	TGGT1_284560	44.55	545.818	2	1089.62	3.3	NSH	0.296	8	0.596685
	RPN6a(333-341)	GLDKQIQEL		9	26S proteasome regulatory subunit, S6a family AAA ATpase	RPN6a	TGME49_100310	38.37	522.287	2	1042.57	-6.7	NSH	0.605	2	0.513932
	RPN6a(337-345)	QIQELIEAT	Q(-17.03)IQELIEAT	9	26S proteasome regulatory subunit, S6a family AAA ATpase	RPN6a	TGME49_100310	36.55	514.272	2	1026.52	6.8	0.777778	0.124	32	0.520124
	RPP2(9-23)	YLMVVLSGTDAPTKK		15	ribosomal protein RPP2	RPP2	TGGT1_309810	75.43	541.622	3	1621.87	-18.1	NSH	0.23	10	0.0816327
	RPS10(22-33)	YLFKEGVIVVQK		12	ribosomal protein RPS10	RPS10	TGGT1_275810	58.64	474.949	3	1421.83	-1.7	NSH	0.191	15	0.15
	RPS10(75-84)	FLTNEGIEFL		10	ribosomal protein RPS10	RPS10	TGGT1_275810	37.2	591.812	2	1181.6	10.9	NSH	0.768	0.5	0.521127
	RPS10(75-86)	FLTNEGIEFLRT		12	ribosomal protein RPS10	RPS10	TGGT1_275810	47.89	720.373	2	1438.75	-10.1	0.666667	0.384	5	0.528571
	RPS17(108-126)	ALDINLPNVVVPSAGRPSN		19	ribosomal protein RPS17	RPS17	TGGT1_207840	54.5	645.028	3	1932.04	10.7	NSH	0.103	32	0.946903
	RPS17(108-128)	ALDINLPNVVVPSAGRPSNNQ		21	ribosomal protein RPS17	RPS17	TGGT1_207840	63.48	725.728	3	2174.14	8.3	NSH	0.081	32	0.963964
	RPS17(108-129)	ALDINLPNVVVPSAGRPSNNQN		22	ribosomal protein RPS17	RPS17	TGGT1_207840	58.56	763.739	3	2288.19	4	NSH	0.084	32	0.972727
	RPS17(108-132)	ALDINLPNVVVPSAGRPSNNQNRRN		25	ribosomal protein RPS17	RPS17	TGGT1_207840	43.36	679.606	4	2714.43	-13.9	0.4	0.055	50	1
	RPS19(159-168)	YLYETPLETR		10	ribosomal protein RPS19	RPS19	TGGT1_212290	35.32	642.822	2	1283.64	-8.3	NSH	0.28	8	0.521452
	RPS19(159-171)	YLYETPLETRVHT		13	ribosomal protein RPS19	RPS19	TGGT1_212290	59.22	541.282	3	1620.81	6.3	NSH	0.683	1.5	0.526667
	RPS19(159-176)	YLYETPLETRVHTVKDVK		18	ribosomal protein RPS19	RPS19	TGGT1_212290	49.35	548.553	4	2190.17	6.6	NSH	0.23	10	0.535593
	RPS25(102-110)	KLLADIPKA		9	ribosomal protein RPS25	RPS25	TGGT1_231140	36.36	484.818	2	967.607	14.9	NSH	0.738	0.8	0.664474
	RPS28(79-90)	FMADETDLAGRS		12	ribosomal protein RPS28	RPS28	TGGT1_209290	49.66	656.784	2	1311.58	-17.2	NSH	0.352	6	0.735849
	RPS28(79-91)	FMADETDLAGRSL		13	ribosomal protein RPS28	RPS28	TGGT1_209290	33.44	713.341	2	1424.66	4.3	NSH	0.723	0.8	0.742857
	RPS6(141-152)	IRKLFNLSKDQD	IRKLFNLSKDQ(+.98)D	12	ribosomal protein RPS6	RPS6	TGGT1_210690	35.73	493.274	3	1476.79	5.1	NSH	0.007	50	0.57377
	RPS6(143-158)	KLFNLSKDQDVRKYVV	KLFNLSKDQ(+.98)DVRKYVV	16	ribosomal protein RPS6	RPS6	TGGT1_210690	44.58	651.693	3	1952.07	-8.1	0.8125	0.701	1	0.591667
	RPSA(10-19)	SLQEDSIAKM		10	ribosomal protein RPSA	RPSA	TGGT1_266060	43.5	561.26	2	1120.54	-33.1	NSH	0.504	3	0.032491
	RRMC(410-422)	AMMEMGTEAEAVA		13	RNA recognition motif-containing protein	RRMC	TGGT1_290660	41.8	670.77	2	1339.55	-15.2	NSH	0.731	0.8	0.944573
	RRMC(410-425)	AMMEMGTEAEAVAAVM		16	RNA recognition motif-containing protein	RRMC	TGGT1_290660	41.12	821.359	2	1640.69	6.6	NSH	0.702	1	0.951163
	RRMC(410-434)	AMMEMGTEAEAVAAVMYLHNHELHG		25	RNA recognition motif-containing protein	RRMC	TGGT1_290660	47.39	686.318	4	2741.21	13.1	0.48	0.311	7	0.971496
	TALDO(261-271)	HLMDEAVEVAK		11	transaldolase	TALDO	TGGT1_229360	31.84	414.545	3	1240.61	0.4	NSH	0.138	32	0.482375
	TC4(28-41)	ILVGDGGVGKTTLV		14	GTP-binding nuclear protein RAN/TC4	TC4	TGGT1_248340	35.6	664.887	2	1327.77	-8.3	0.785714	0.575	3	0.125581
	TGGT1_203600 (347-357)	TLLAAVRGEAA		11	hypothetical protein TGGT1_203600	TGGT1_203600	TGGT1_203600	46.53	536.306	2	1070.61	-11.2	NSH	0.379	6	0.808411
	TGGT1_204870(180-191)	FRGLLAEARIVG	F(+42.01)RGLLAEARIVG	12	hypothetical protein TGGT1_204870	TGGT1_204870	TGGT1_204870	34.35	448.596	3	1342.77	-3.8	NSH	0.014	50	0.284127
	TGGT1_210810 (18-35)	LMDVTLQRLEEEEENADK		18	hypothetical protein TGGT1_210810	TGGT1_210810	TGGT1_210810	62.85	721.34	3	2161.02	-10.2	NSH	0.068	32	0.191011
	TGGT1_210810 (18-43)	LMDVTLQRLEEEEENADKKGDNGTDR	LMDVTLQRLEEEEENADKKGDN(+.98)GTDR	26	hypothetical protein TGGT1_210810	TGGT1_210810	TGGT1_210810	50.47	752.34	4	3005.39	-18.9	NSH	0.056	50	0.209877
	TGGT1_212300(560-581)	KVFDILVSTNTSQDSGGDGSFA		22	hypothetical protein TGGT1_212300	TGGT1_212300	TGGT1_212300	36.98	749.029	3	2244.05	4.7	NSH	0.622	2	0.845688
	TGGT1_215220(325-339)	VLAEALTEIENLERL		15	hypothetical protein TGGT1_215220	TGGT1_215220	TGGT1_215220	64.63	571.649	3	1711.94	-6.8	NSH	0.761	0.8	0.665298
	TGGT1_220950(160-174)	KLVELDTGVASPVFA		15	hypothetical protein TGGT1_220950	TGGT1_220950	TGGT1_220950	41.37	773.438	2	1544.85	10.1	NSH	0.682	1.5	0.498433
	TGGT1_226660(2812-2821)	VTLSAHPLTL	VTLSAHPLTL(+21.98)	10	hypothetical protein TGGT1_226660	TGGT1_226660	TGGT1_226660	36.51	358.538	3	1072.59	2.1	NSH	0.316	7	0.754428
	TGGT1_228630(316-328)	GLFDDLGFDHDEL		13	hypothetical protein TGGT1_228630	TGGT1_228630	TGGT1_228630	54.6	746.816	2	1491.65	-23	NSH	0.736	0.8	1
	TGGT1_232080(10116-10124)	GILNFLTSV	GILN(+.98)FLTSV	9	hypothetical protein TGGT1_232080	TGGT1_232080	TGGT1_232080	31.84	482.772	2	963.528	2.9	NSH	0.808	0.3	0.980136
	TGGT1_240060(578-610)	MLYAGAPTTVQSHPGSASLEVPAAFGKVEEGPR		33	hypothetical protein TGGT1_240060	TGGT1_240060	TGGT1_240060	33.13	839.425	4	3353.67	-0.7	0.333333	0.183	15	0.711467
	TGGT1_243460 (1630-1642)	FLGTLPGIAGVGR		13	hypothetical protein TGGT1_243460	TGGT1_243460	TGGT1_243460	53.86	629.373	2	1256.72	6.4	NSH	0.1	32	0.815315
	TGGT1_244470(916-934)	ALLPELPRLDALPQSPLPR		19	hypothetical protein TGGT1_244470	TGGT1_244470	TGGT1_244470	41.38	699.418	3	2095.22	8.1	NSH	0.117	32	0.355202
	TGGT1_249990(186-199)	RLNESFDDQTEETL		14	hypothetical protein TGGT1_249990	TGGT1_249990	TGGT1_249990	32.74	848.878	2	1695.76	-9.7	NSH	0.504	3	0.224515
	TGGT1_249990(621-630)	FLDELAKVFT		10	hypothetical protein TGGT1_249990	TGGT1_249990	TGGT1_249990	57.47	591.825	2	1181.63	2	NSH	0.614	2	0.748792
	TGGT1_258870A(391-404)	RLIEALEAMKGSNS		14	hypothetical protein TGGT1_258870A	TGGT1_258870A	TGGT1_258870A	42.39	506.938	3	1517.79	4	NSH	0.306	7	0.718232
	TGGT1_258870A(391-405)	RLIEALEAMKGSNSK		15	hypothetical protein TGGT1_258870A	TGGT1_258870A	TGGT1_258870A	63.9	549.632	3	1645.88	-4.9	NSH	0.149	15	0.719557
	TGGT1_258870A(465-477)	SLAEEPLDGQQAA		13	hypothetical protein TGGT1_258870A	TGGT1_258870A	TGGT1_258870A	53.31	664.81	2	1327.63	-15.6	NSH	0.508	3	0.852941
	TGGT1_258870A(465-483)	SLAEEPLDGQQAAARESQL		19	hypothetical protein TGGT1_258870A	TGGT1_258870A	TGGT1_258870A	81.75	671.665	3	2011.98	-4.4	NSH	0.531	3	0.862454
	TGGT1_258870A(465-484)	SLAEEPLDGQQAAARESQLR		20	hypothetical protein TGGT1_258870A	TGGT1_258870A	TGGT1_258870A	36.88	723.686	3	2168.08	-21.5	NSH	0.074	32	0.86406
	TGGT1_266970(230-241)	FLLDDLKQILVT		12	hypothetical protein TGGT1_266970	TGGT1_266970	TGGT1_266970	51.67	709.416	2	1416.82	-3.3	NSH	0.727	0.8	0.778912
	TGGT1_269690(392-401)	NLLSDLSVRL		10	hypothetical protein TGGT1_269690	TGGT1_269690	TGGT1_269690	48.97	565.336	2	1128.65	7.1	NSH	0.645	1.5	0.45731
	TGGT1_269690(393-411)	LLSDLSVRLEDYMQTAEER		19	hypothetical protein TGGT1_269690	TGGT1_269690	TGGT1_269690	71.25	756.715	3	2267.11	5.2	NSH	0.119	32	0.463357
	TGGT1_269690(393-412)	LLSDLSVRLEDYMQTAEERK		20	hypothetical protein TGGT1_269690	TGGT1_269690	TGGT1_269690	38.6	599.813	4	2395.21	7.6	NSH	0.088	32	0.463905
	TGGT1_269690(502-512)	GVIEEDLKAVV		11	hypothetical protein TGGT1_269690	TGGT1_269690	TGGT1_269690	51.65	586.33	2	1170.65	-3.1	NSH	0.318	7	0.586651
	TGGT1_269690(603-618)	FMIEALEETFGPVKNK		16	hypothetical protein TGGT1_269690	TGGT1_269690	TGGT1_269690	72.13	618.317	3	1851.94	-8	NSH	0.243	10	0.648707
	TGGT1_269950(603-617)	FMIEALEETFGPVKN		15	hypothetical protein TGGT1_269950	TGGT1_269950	TGGT1_269950	52.44	862.925	2	1723.85	-8.4	NSH	0.349	6	0.648009
	TGGT1_289380(252-266)	VMFVGDSAERDLEVA		15	hypothetical protein TGGT1_289380	TGGT1_289380	TGGT1_289380	44.57	819.364	2	1636.78	-38.5	NSH	0.49	4	0.276432
	TGGT1_299780 (274-290)	SLQPDTFVLEATLPIRR		17	hypothetical protein TGGT1_299780	TGGT1_299780	TGGT1_299780	40.58	652.701	3	1955.08	-0.9	NSH	0.074	32	0.517045
	TGGT1_308870(465-477)	FLAVGGSAGPPLT		13	hypothetical protein TGGT1_308870	TGGT1_308870	TGGT1_308870	40.83	593.82	2	1185.64	-12.1	NSH	0.579	3	0.682353
	TGGT1_309760(239-249)	KLFHLDSTLLA		11	hypothetical protein TGGT1_309760	TGGT1_309760	TGGT1_309760	33.91	629.362	2	1256.71	-2.4	NSH	0.644	1.5	0.782895
	TGGT1_309760(239-257)	KLFHLDSTLLALSPNAPRE		19	hypothetical protein TGGT1_309760	TGGT1_309760	TGGT1_309760	62.87	531.298	4	2121.16	2.7	NSH	0.105	32	0.804054
	TGGT1_309760(242-257)	HLDSTLLALSPNAPRE		16	hypothetical protein TGGT1_309760	TGGT1_309760	TGGT1_309760	70.22	867.464	2	1732.91	1.7	NSH	0.075	32	0.80602
	TGGT1_309760(242-261)	HLDSTLLALSPNAPRELLEA		20	hypothetical protein TGGT1_309760	TGGT1_309760	TGGT1_309760	57.66	720.73	3	2159.16	4.9	NSH	0.562	3	0.816949
	TGGT1_309760(242-262)	HLDSTLLALSPNAPRELLEAR		21	hypothetical protein TGGT1_309760	TGGT1_309760	TGGT1_309760	45.61	772.746	3	2315.26	-18.9	NSH	0.08	32	0.819728
	TGGT1_310790(201-219)	KLFQYIAPGGLDEEKAEEL		19	hypothetical protein TGGT1_310790	TGGT1_310790	TGGT1_310790	60.57	717.352	3	2149.09	-27.5	NSH	0.832	0.2	1
	TrpRS2(176-191)	YLDEFGIPANVKEVRL		16	tryptophanyl-tRNA synthetase (TrpRS2)	TrpRS2	TGGT1_288360	67.03	621.667	3	1861.99	-7.2	NSH	0.798	0.4	0.26003
	TrpRS2(400-412)	YLQDVFDVPLVIQ		13	tryptophanyl-tRNA synthetase (TrpRS2)	TrpRS2	TGGT1_288360	47.93	774.923	2	1547.82	5.4	0.846154	0.264	9	0.590237
	TUBA1(172-182)	SLLEHTDVAVM		11	alpha tubulin TUBA1	TUBA1	TGGT1_316400B	37.32	607.818	2	1213.6	16.3	0.636364	0.561	3	0.406176
	TUBA1(391-400)	GMEEGEFSEA		10	alpha tubulin TUBA1	TUBA1	TGGT1_316400B	37.82	543.205	2	1084.4	-6.8	NSH	0.413	5	0.924171
	TUBB(64-75)	ILMDLEPGTMDS		12	beta-tubulin	TUBB	TGGT1_266960	57.52	661.31	2	1320.59	8.5	0.916667	0.453	4	0.144165
	TUBB(64-76)	ILMDLEPGTMDSV		13	beta-tubulin	TUBB	TGGT1_266960	59.66	710.841	2	1419.66	2.9	0.923077	0.891	0.08	0.144495
	TUBB(64-84)	ILMDLEPGTMDSVRAGPFGQL		21	beta-tubulin	TUBB	TGGT1_266960	46.35	749.703	3	2246.11	-8.8	0.857143	0.74	0.8	0.147196
	UFP(16-27)	FVLELEPEWTVK		12	ubiquitin family protein	UFP	TGGT1_223680	57.21	745.421	2	1488.79	27.6	NSH	0.082	32	0.0387597
