# Supplementary material for: Toxoplasma gondii peptide ligands open the gate of the HLA class I binding groove
Source: eLife. 2016 Jan 29;5:e12556. doi: 10.7554/eLife.12556 (PMC4775218; doi:10.7554/eLife.12556)
Supplement: Supplementary file 3. — Bold sequences indicate the peptides selected for the binding assay. DOI: http://dx.doi.org/10.7554/eLife.12556.018 [file elife-12556-supp3.xlsx]

## Sheet: Sheet1
	Ligand Name	Native Ligand				Nested Binding Core						Alternate N-terminal Nested Binding Core
		Ligand Sequence	Length	Predictied Affinity	Rank	Sequence	Length	Predictied Affinity	Rank	Extension Length	Position	Sequence	Length	Predictied Affinity	Rank	Extension Length	AA Position
	PLA(233-250)	ALAALAPSLEVGKPAKNE	18	0.062	32	ALAALAPSLEV	11	0.796	0.4	7	n-terminal
	RPS17(108-126)	ALDINLPNVVVPSAGRPSN	19	0.103	32	ALDINLPNV	9	0.766	0.8	10	n-terminal
	RPS17(108-128)	ALDINLPNVVVPSAGRPSNNQ	21	0.081	32	ALDINLPNV	9	0.766	0.8	12	n-terminal
	RPS17(108-129)	ALDINLPNVVVPSAGRPSNNQN	22	0.084	32	ALDINLPNV	9	0.766	0.8	13	n-terminal
	RPS17(108-132)	ALDINLPNVVVPSAGRPSNNQNRRN	25	0.055	50	ALDINLPNV	9	0.766	0.8	16	n-terminal
	TGGT1_244470(916-934)	ALLPELPRLDALPQSPLPR	19	0.117	32	ALLPELPRL	9	0.716	1	10	n-terminal
	EEF1A(326-340)	FLAQVIVLNHPGEIK	15	0.14	16	FLAQVIVL	8	0.808	0.3	7	n-terminal
	TGGT1_243460 (1630-1642)	FLGTLPGIAGVGR	13	0.1	32	FLGTLPGIAGV	11	0.761	0.8	2	n-terminal
	pSPS(70-108)	FLNQLARPVAFPADETENKEDDAEKGGEGEAELSGKAEE	39	0.124	32	FLNQLARPV	9	0.728	0.8	30	n-terminal
	GRA12(325-337)	FLNTVEVRVTGMD	13	0.118	32	FLNTVEVRV	9	0.761	0.8	4	n-terminal
	AARS(1172-1185)	FLVLNLPQLLGDGK	14	0.124	32	FLVLNLPQL	9	0.77	0.5	5	n-terminal
	UFP(16-27)	FVLELEPEWTVK	12	0.082	32	FVLELEPEWTV	11	0.864	0.12	1	n-terminal
	GRA2(161-173)	GLAETEVPVEPQQ	13	0.144	16	GLAETEVPV	9	0.808	0.3	4	n-terminal
	GRA2(161-174)	GLAETEVPVEPQQR	14	0.075	32	GLAETEVPV	9	0.808	0.3	5	n-terminal
	GRA2(161-185)	GLAETEVPVEPQQRAAHVPVPDFSQ	25	0.173	15	GLAETEVPV	9	0.808	0.3	16	n-terminal
	TALDO(261-271)	HLMDEAVEVAK	11	0.138	32	HLMDEAVEV	9	0.876	0.1	2	n-terminal
	ABCB1(1256-1274)	ILDEATSALDPESERQVQK	19	0.117	32	ILDEATSAL	9	0.789	0.4	10	n-terminal
	DG32(250-260)	ILFDSKLATIR	11	0.121	32	ILFDSKLATI	10	0.71	1	1	n-terminal
	TGGT1_309760(239-257)	KLFHLDSTLLALSPNAPRE	19	0.105	32	KLFHLDSTLL	10	0.721	0.8	9	n-terminal
	BFCCP(150-159)	KLLDQIKQLK	10	0.094	32	KLLDQIKQL	9	0.767	0.5	1	n-terminal
	HSP70(395-414)	LLDVAPLSLGLETAGGVMTK	20	0.101	32	LLDVAPLSLGL	11	0.611	2	9	n-terminal
	NTPA2(1-14)	LLFQYVPQMHEGAK	14	0.163	15	LLFQYVPQM	9	0.742	0.8	5	n-terminal
	TGGT1_269690(393-411)	LLSDLSVRLEDYMQTAEER	19	0.119	32	LLSDLSVRL	9	0.798	0.4	10	n-terminal
	TGGT1_269690(393-412)	LLSDLSVRLEDYMQTAEERK	20	0.088	32	LLSDLSVRL	9	0.798	0.4	11	n-terminal
	pPAP2G4(417-435)	LLYEKELDSIHTVEDESLK	19	0.136	32	LLYEKELDSI	10	0.682	1.5	9	n-terminal
	pTCP1(42-61)	MLVDDIGDMTITNDGATILK	20	0.133	32	MLVDDIGDMTI	11	0.68	1.5	9	n-terminal
	pTCP1(42-71)	MLVDDIGDMTITNDGATILKQLEVQHPAAK	30	0.146	16	MLVDDIGDMTI	11	0.68	1.5	19	n-terminal
	TGGT1_240060(578-610)	MLYAGAPTTVQSHPGSASLEVPAAFGKVEEGPR	33	0.183	15	MLYAGAPTTV	10	0.856	0.15	23	n-terminal
	TGGT1_258870A(391-405)	RLIEALEAMKGSNSK	15	0.149	15	RLIEALEAM	9	0.713	1	6	n-terminal
	EEF1A(213-224)	TLVEALDTMEAP	12	0.127	32	TLVEALDTMEA	11	0.598	2	1	n-terminal
	EEF1A(213-225)	TLVEALDTMEAPK	13	0.11	32	TLVEALDTMEA	11	0.598	2	2	n-terminal
	EEF1A(213-231)	TLVEALDTMEAPKRPSDKP	19	0.074	32	TLVEALDTMEA	11	0.598	2	8	n-terminal
	pPSMC1(309-327)	TMLELLNQLDGFESKGDVK	19	0.079	32	TMLELLNQL	9	0.783	0.5	10	n-terminal
	DG32(94-106)	VMSELEFYLFGEK	13	0.132	32	VMSELEFYL	9	0.895	0.08	4	n-terminal
	RPS10(22-33)	YLFKEGVIVVQK	12	0.191	15	YLFKEGVIVV	10	0.815	0.3	2	n-terminal
	RPL7A(15-30)	YLSPIASPLLDGKSLR	16	0.167	15	YLSPIASPLL	10	0.868	0.1	6	n-terminal
	AARS(1114-1128)	GLLDGAGPLPLVGKR	15	0.078	32	LLDGAGPLPLV	11	0.804	0.4	4	central	GLLDGAGPL	9	0.72	0.8	6	1
	HSP70(393-414)	LLLLDVAPLSLGLETAGGVMTK	22	0.128	32	LLLDVAPL	8	0.85	0.15	14	central	LLLLDVAPL	9	0.709	1	13	1
	GRA12(209-219)	VFLLLAPAPTF	11	0.07	32	FLLLAPAPT	9	0.729	0.8	2	central
	NARS(589-604)	AMDVLVPKIGELVGGS	16	0.18	15	VLVPKIGELV	10	0.597	2	6	central	AMDVLVPKI	9	0.572	3	7	1
	NARS(589-605)	AMDVLVPKIGELVGGSQ	17	0.093	32	VLVPKIGELV	10	0.597	2	7	central	AMDVLVPKI	9	0.572	3	8	1
	NARS(589-609)	AMDVLVPKIGELVGGSQREDD	21	0.04	50	VLVPKIGELV	10	0.597	2	11	central	AMDVLVPKI	9	0.572	3	12	1
	NARS(589-610)	AMDVLVPKIGELVGGSQREDDR	22	0.042	50	VLVPKIGELV	10	0.597	2	12	central	AMDVLVPKI	9	0.572	3	13	1
	NARS(589-611)	AMDVLVPKIGELVGGSQREDDRD	23	0.041	50	VLVPKIGELV	10	0.597	2	13	central	AMDVLVPKI	9	0.572	3	14	1
	TGGT1_204870(180-191)	FRGLLAEARIVG	12	0.014	50	LLAEARIV	8	0.592	2	4	central
	TGGT1_309760(242-257)	HLDSTLLALSPNAPRE	16	0.075	32	TLLALSPNA	9	0.649	1.5	7	central	HLDSTLLAL	9	0.634	1.5	7	1
	TGGT1_309760(242-262)	HLDSTLLALSPNAPRELLEAR	21	0.08	32	TLLALSPNA	9	0.649	1.5	12	central	HLDSTLLAL	9	0.634	1.5	12	1
	TGGT1_299780 (274-290)	SLQPDTFVLEATLPIRR	17	0.074	32	FVLEATLPI	9	0.831	0.2	8	central	SLQPDTFV	8	0.708	1	9	1
	GRA12(359-385)	ATYIPVSMYLSTDPTLTHEYEAAKTVK	27	0.053	50	YLSTDPTL	8	0.723	0.8	19	central
	GRA12(358-384)	RATYIPVSMYLSTDPTLTHEYEAAKTV	27	0.154	15	YLSTDPTL	8	0.723	0.8	19	central
	GRA12(358-385)	RATYIPVSMYLSTDPTLTHEYEAAKTVK	28	0.019	50	YLSTDPTL	8	0.723	0.8	20	central
	pPTA4(233-241)	QFLSPVVLL	9	0.161	15	FLSPVVLL	8	0.841	0.17	1	c-terminal
