# Supplementary material for: Toxoplasma gondii peptide ligands open the gate of the HLA class I binding groove
Source: eLife. 2016 Jan 29;5:e12556. doi: 10.7554/eLife.12556 (PMC4775218; doi:10.7554/eLife.12556)
Supplement: Supplementary file 4. — DOI: http://dx.doi.org/10.7554/eLife.12556.019 [file elife-12556-supp4.xlsx]

## Sheet: Sheet1
Complex	HLA-A*0201/F11V	HLA-A*0201/F12K
PDB ID	5D9S	5DDH
Data collection
Resolution range (Å)a	50.0-1.87 (1.91-1.87)	40.0-1.50 (1.53-1.50)
Completeness (%)a	99.8 (99.0)	99.4 (99.7)
Number of unique reflections	36209	70232
Redundancy	3.5	3.4
Rsym (%)	5.0 (40.0)	7.2 (65.5)
Rpim (%)	4.1 (29.6)	3.9 (35.5)
I/sa	25.6 (2.7)	34.1(2.6)
Refinement statistics
Number of reflections (F>0)	35062	68794
Maximum resolution (Å)	1.87	1.5
Rcryst (%)	16.4 (25.3)	19.5 (24.7)
Rfree (%)	22.2 (30.9)	21.9 (25.2)
Number of atoms	3558	3462
Protein	3015	3004
Peptide	96	105
Glycerol	1	1
Solvent molecules (waters)	446	229/4
Ramachandran statistics (%)
Favored	98.6	98.6
Outliers	0	0
R.m.s.d. from ideal geometry
Bond length (Å)	0.016	0.013
Bond angles (°)	1.7	1.43
Average B values (Å2)
Protein	52.5	25.6
Peptide	77.5	53.6
Water molecules	32.45	19.6
aNumber in parentheses refer to the highest resolution shell.
